# Supplementary material for: Plastome phylogenomics reveals an early Pliocene North- and Central America colonization by long-distance dispersal from South America of a highly diverse bromeliad lineage
Source: PubMed Central journal article supplement (PMC10326849; doi:10.3389/fpls.2023.1205511), 2023-06-23

A

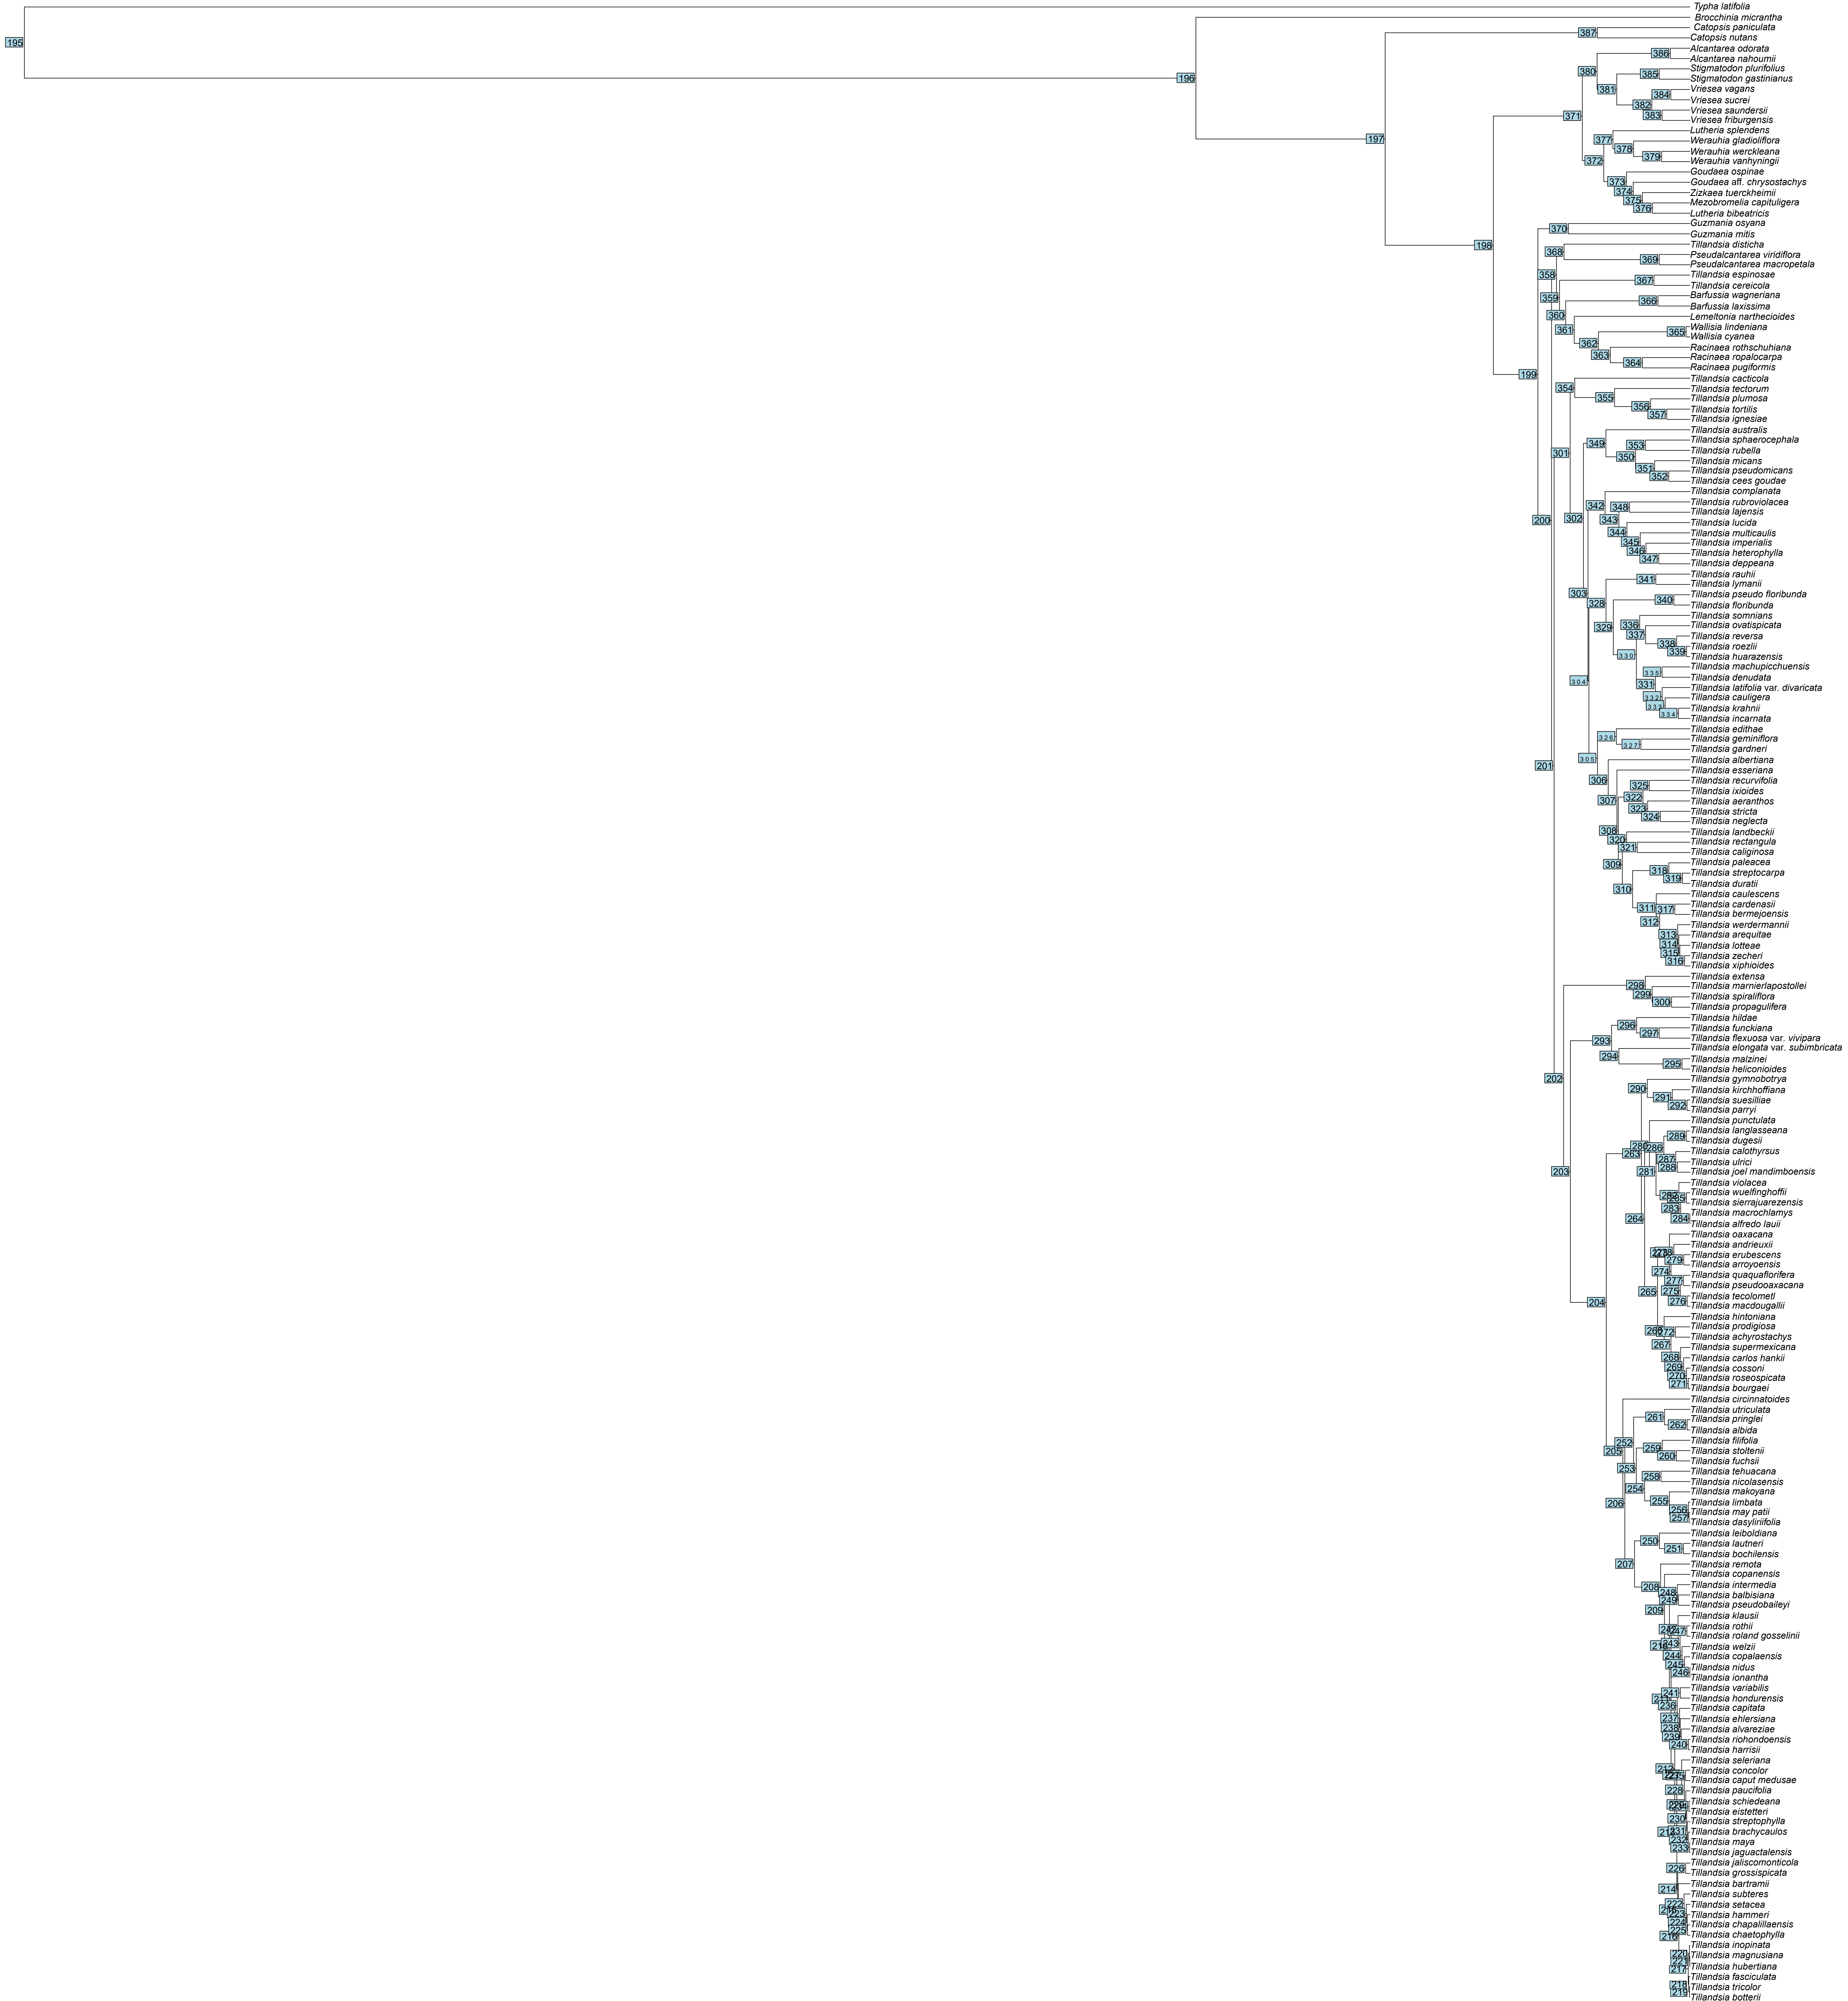

B

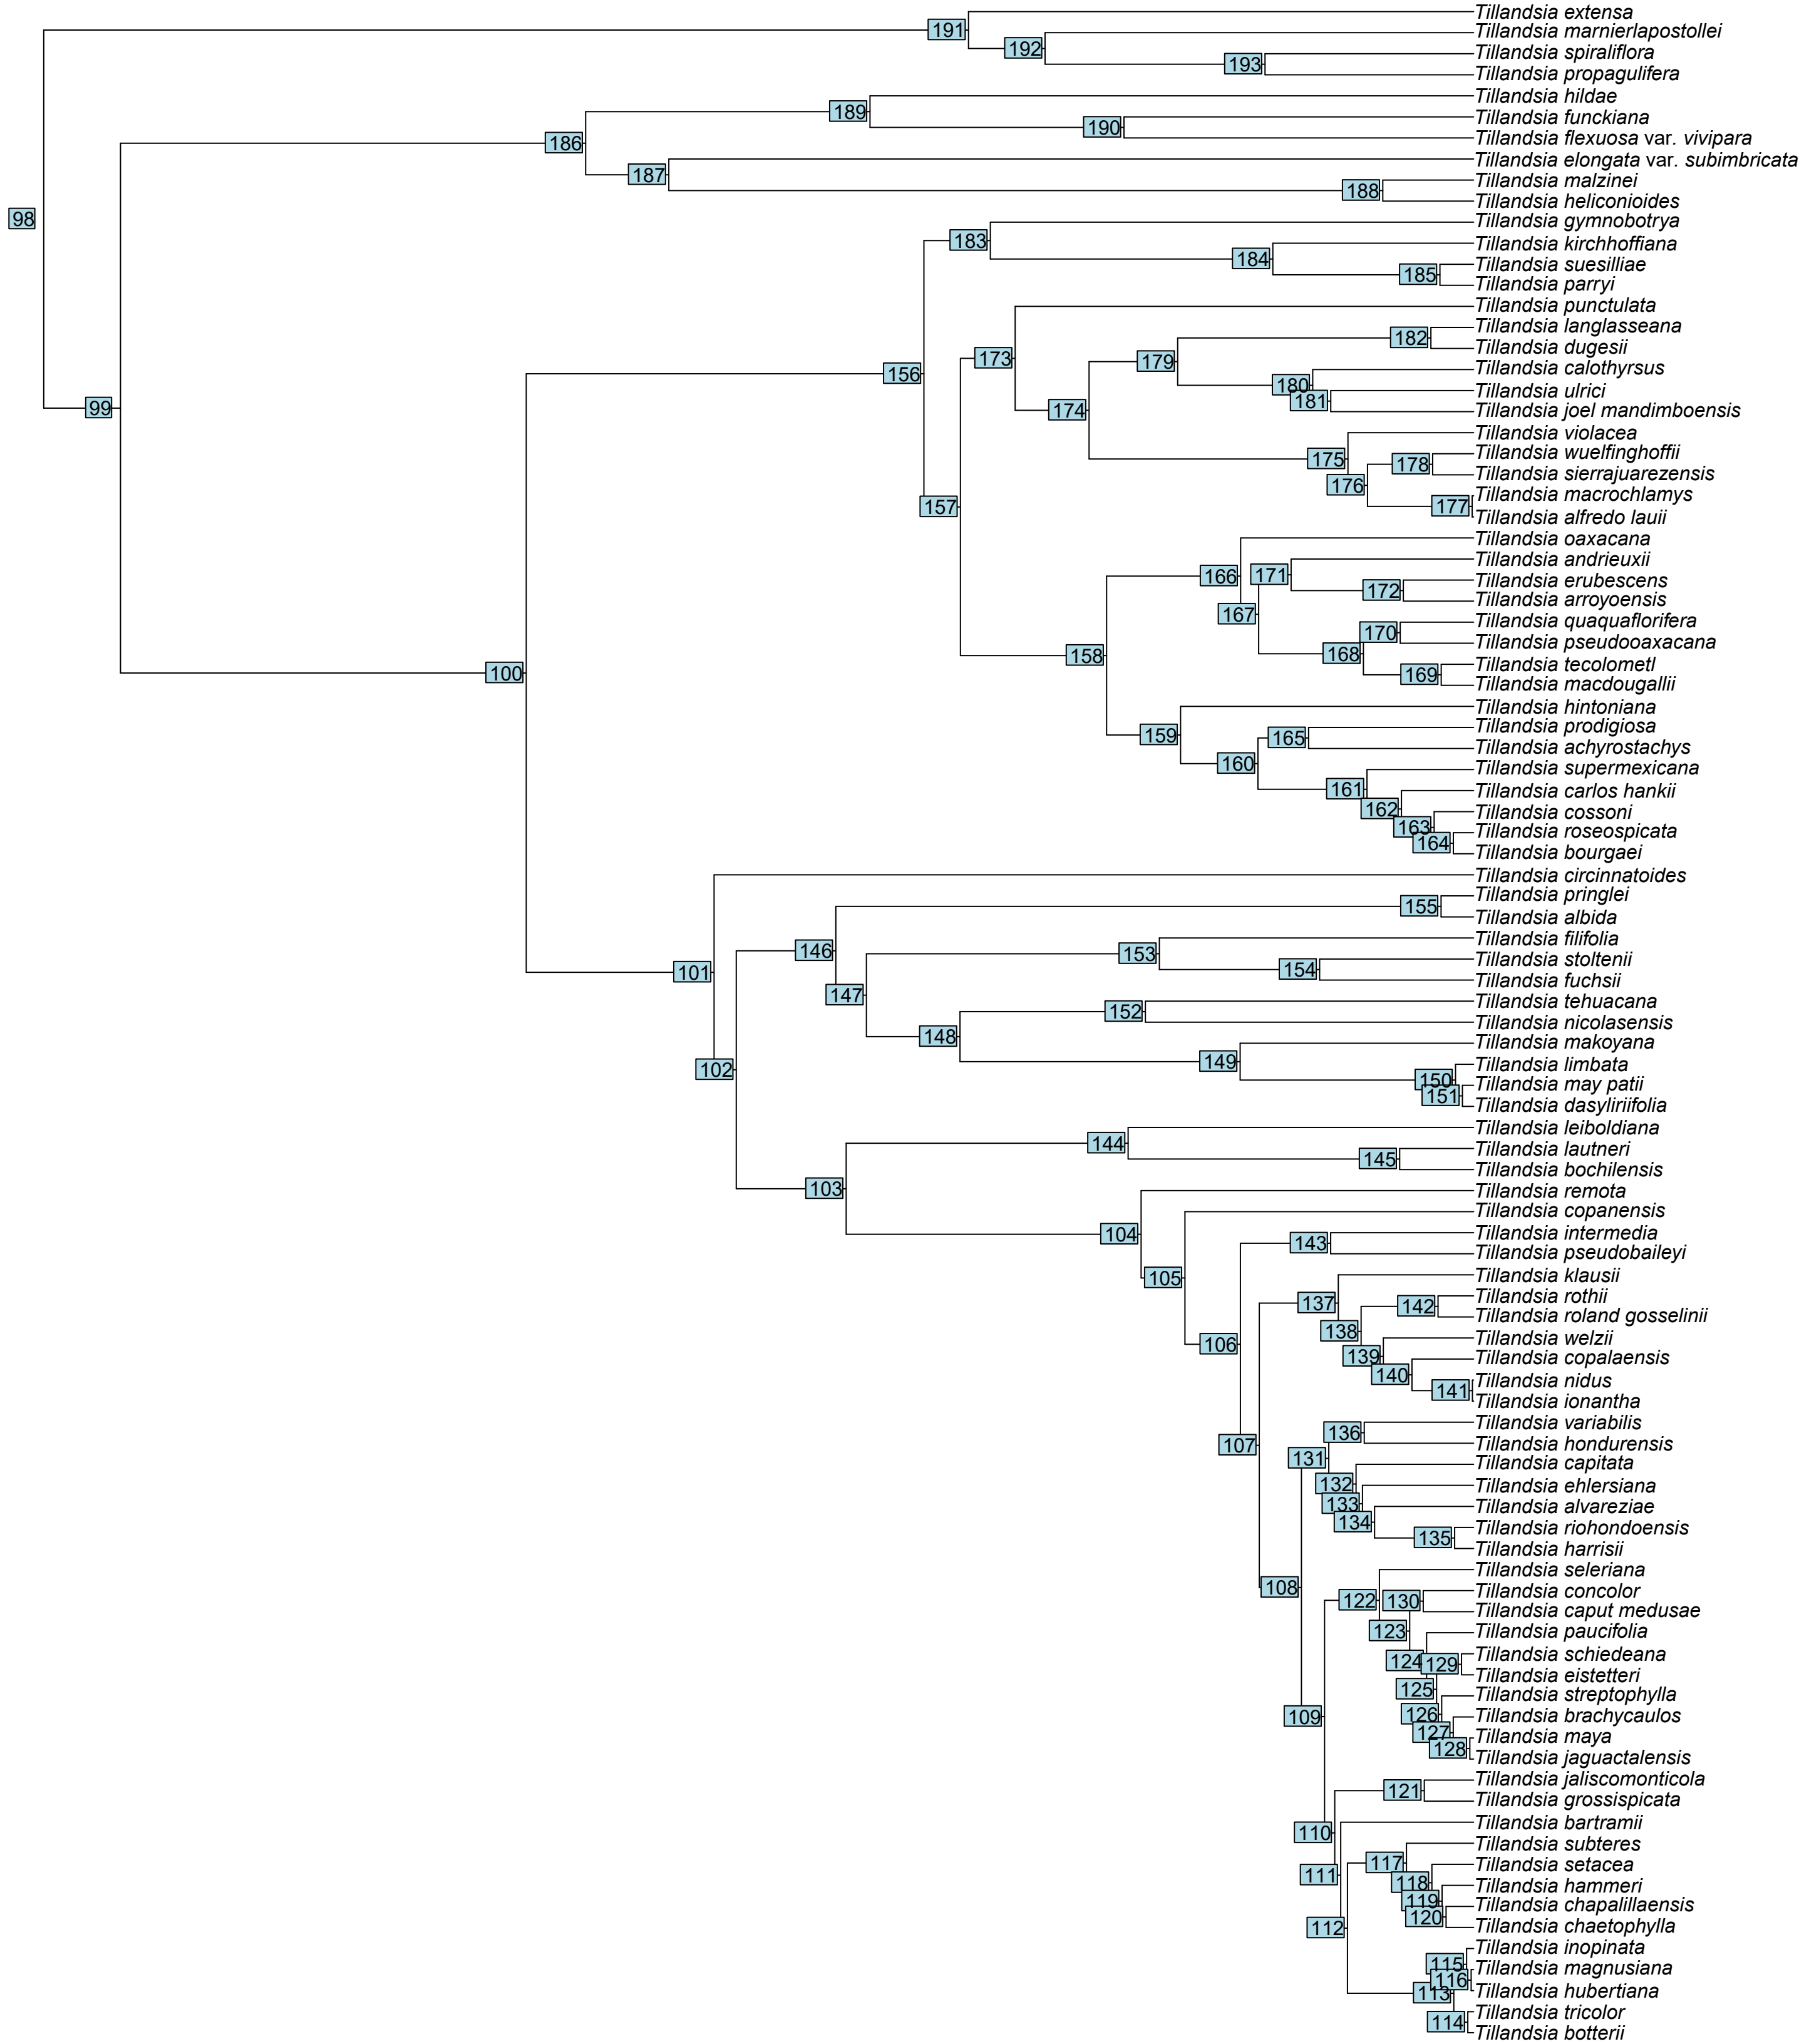

6

4

2

0

C

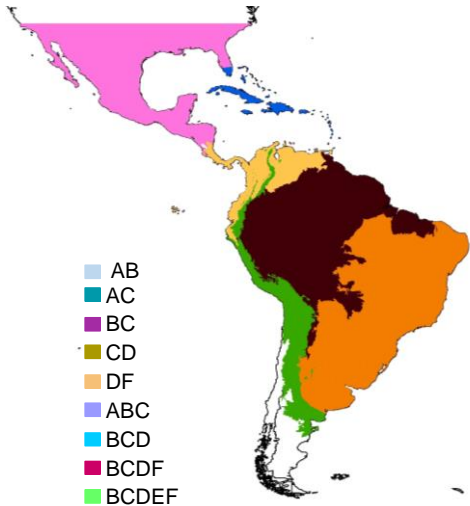

- AB
- AC
- BC
- CD
- DF
- ABC
- BCD
- BCDF
- BCDEF
- BDF
- BCF
- CF
- Chacoan subregion (A)
- Boreal and South Brazilian dominions (B)
- South American transition zone (C)
- Pacific dominion (D)
- Antillean subregion + SE USA (E)
- Mexican transition zone + Mesoamerican dominion + Neartic region (F)

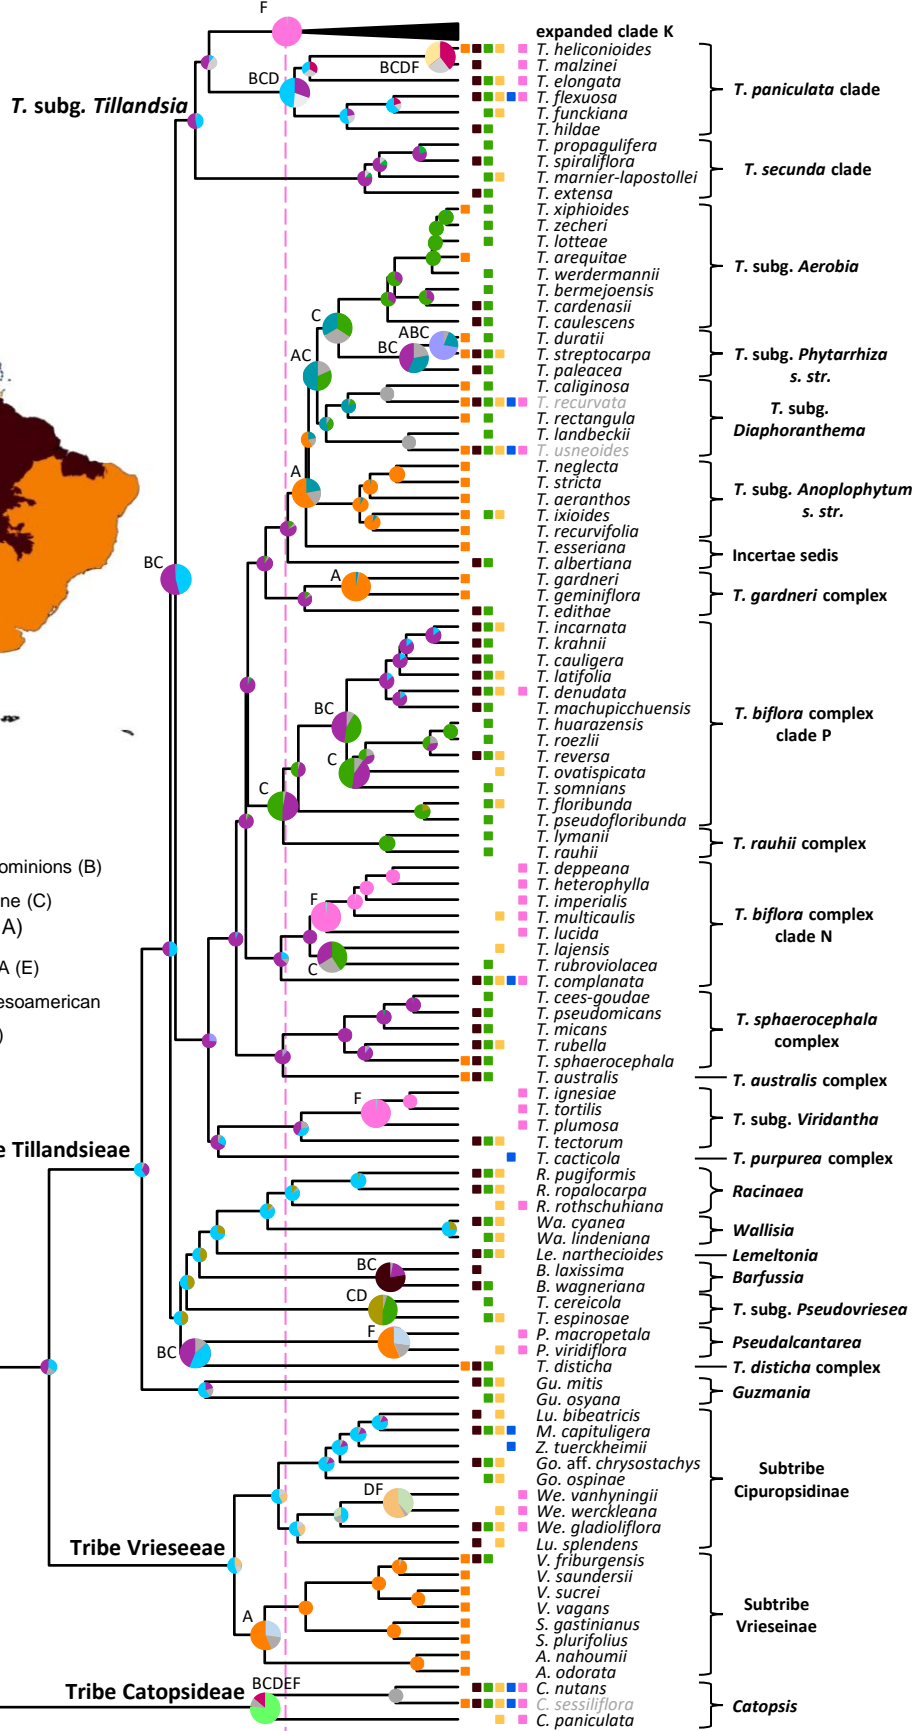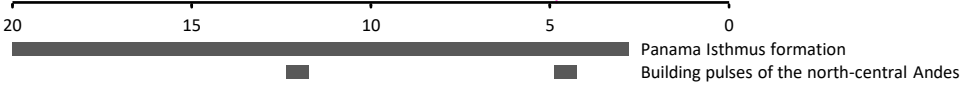

Tillandsioideae

Tribe Tillandsieae

Tribe Vrieseae

Tribe Catopsideae

- expanded clade K
- T. heliconioides*
- T. malzinei*
- T. elongata*
- T. flexuosa*
- T. funckiana*
- T. hildae*
- T. propagulifera*
- T. spiralflorea*
- T. marnier-lapostollei*
- T. extensa*
- T. xiphioides*
- T. zecheri*
- T. lotteae*
- T. arequitae*
- T. werdermannii*
- T. bermejoensis*
- T. cardenasii*
- T. caulescens*
- T. duratii*
- T. streptocarpa*
- T. paleacea*
- T. caliginosa*
- T. recurvata*
- T. rectangula*
- T. landbeckii*
- T. usneoides*
- T. neglecta*
- T. stricta*
- T. aeranthos*
- T. ixioides*
- T. recurvifolia*
- T. esseriana*
- T. albertiana*
- T. gardneri*
- T. geminiflora*
- T. edithae*
- T. incarnata*
- T. krahni*
- T. cauligera*
- T. latifolia*
- T. denudata*
- T. machupicchuensis*
- T. huarazensis*
- T. roezlii*
- T. reversa*
- T. ovatispicata*
- T. somnians*
- T. floribunda*
- T. pseudofloribunda*
- T. lymanii*
- T. rauhii*
- T. deppeana*
- T. heterophylla*
- T. imperialis*
- T. multicaulis*
- T. lucida*
- T. lajensis*
- T. rubroviolacea*
- T. complanata*
- T. cees-goudae*
- T. pseudomicans*
- T. micans*
- T. rubella*
- T. sphaerocephala*
- T. australis*
- T. ignesia*
- T. tortilis*
- T. plumosa*
- T. tectorum*
- T. cacticola*
- R. pugiformis*
- R. ropalocarpa*
- R. rothschuhiana*
- Wa. cyanea*
- Wa. lindeniana*
- Le. narthecioides*
- B. laxissima*
- B. wagneriana*
- T. cereicola*
- T. espinosae*
- P. macropetala*
- P. viridiflora*
- T. disticha*
- Gu. mitis*
- Gu. osyana*
- Lu. bibeatricis*
- M. capituligera*
- Z. tuerckheimii*
- Go. aff. chrysostachys*
- Go. ospinae*
- We. vanhyingnii*
- We. werckleana*
- We. gladioliflora*
- Lu. splendens*
- V. friburgensis*
- V. saundersii*
- V. sucrei*
- V. vagans*
- S. gastinianus*
- S. plurifolius*
- A. nahoumii*
- A. odorata*
- C. nutans*
- C. sessiliflora*
- C. paniculata*

- T. paniculata* clade
- T. secunda* clade
- T. subg. Aerobia*
- T. subg. Phytarrhiza* s. str.
- T. subg. Diaphoranthema*
- T. subg. Anoplophytum* s. str.
- Incertae sedis
- T. gardneri* complex
- T. biflora* complex clade P
- T. rauhii* complex
- T. biflora* complex clade N
- T. sphaerocephala* complex
- T. australis* complex
- T. subg. Viridantha*
- T. purpurea* complex
- Racinaea*
- Wallisia*
- Lemeltonia*
- Barfussia*
- T. subg. Pseudovriesea*
- Pseudalcantarea*
- T. disticha* complex
- Guzmania*
- Subtribe
- Ciproposidinae
- Subtribe
- Vrieseinae
- Catopsis*

**D**

- GH
- HI
- GHJ
- HIJ
- GHIJ
- YGHJIJ
- HJ
- EGHI

- Pacific, Boreal and South Brazilian dominions + South American transition zone (Y)
- Antillean subregion + SE USA (E)
- Pacific Lowlands and Balsas Basin provinces + El Cabo de Baja California District (G)
- Mexican transition zone (H)
- Mosquito, Veracruz and Yucatán Peninsula provinces (I)
- Nearctic region (J)

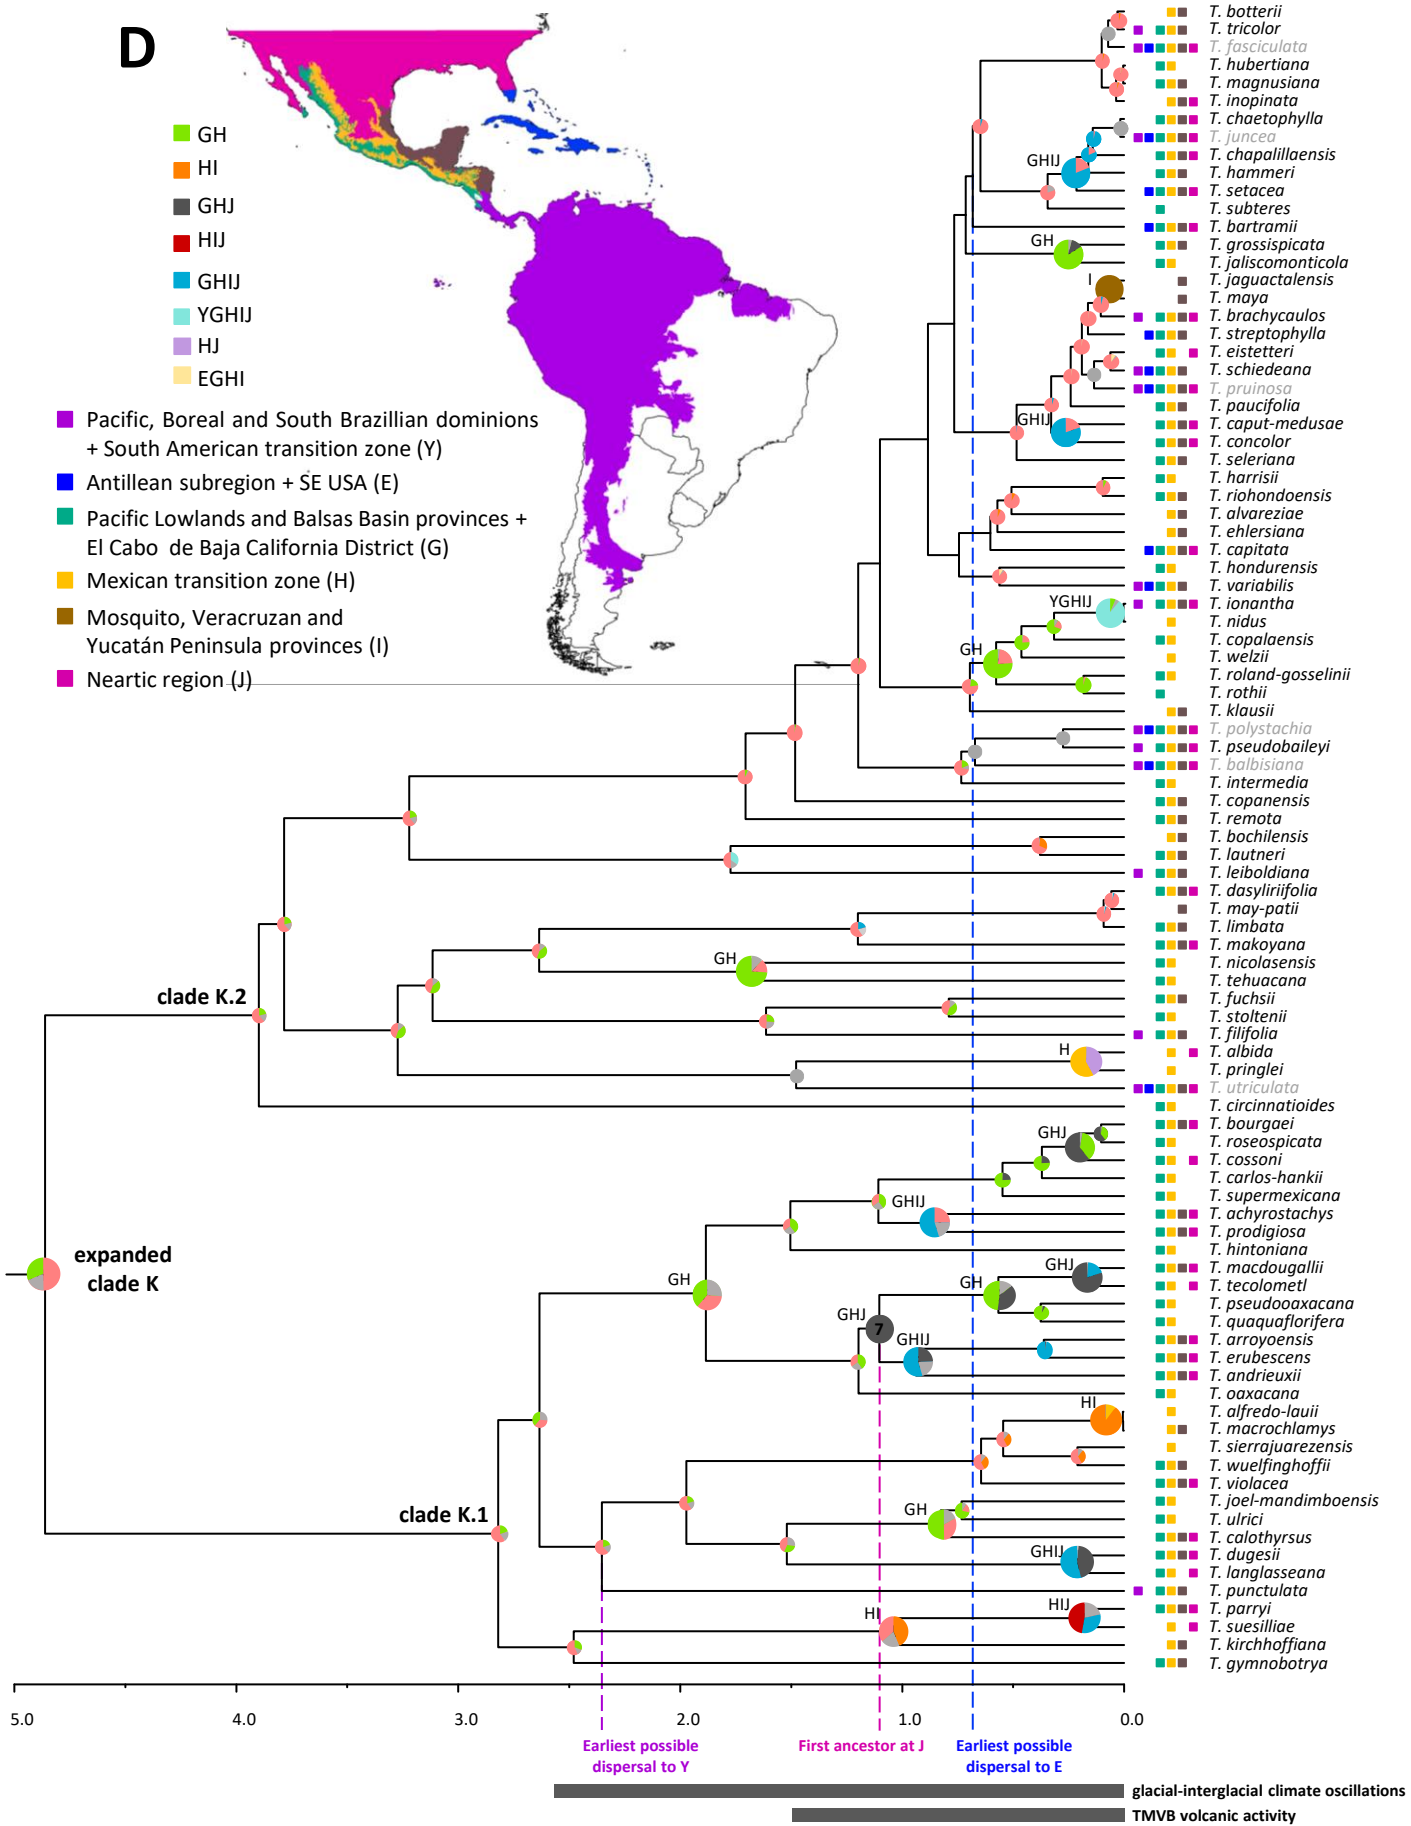

Supplement: Image_1.pdf [file Image_1.pdf]
