# Supplementary material for: Plastome phylogenomics reveals an early Pliocene North- and Central America colonization by long-distance dispersal from South America of a highly diverse bromeliad lineage
Source: PubMed Central journal article supplement (PMC10326849; doi:10.3389/fpls.2023.1205511), 2023-06-23

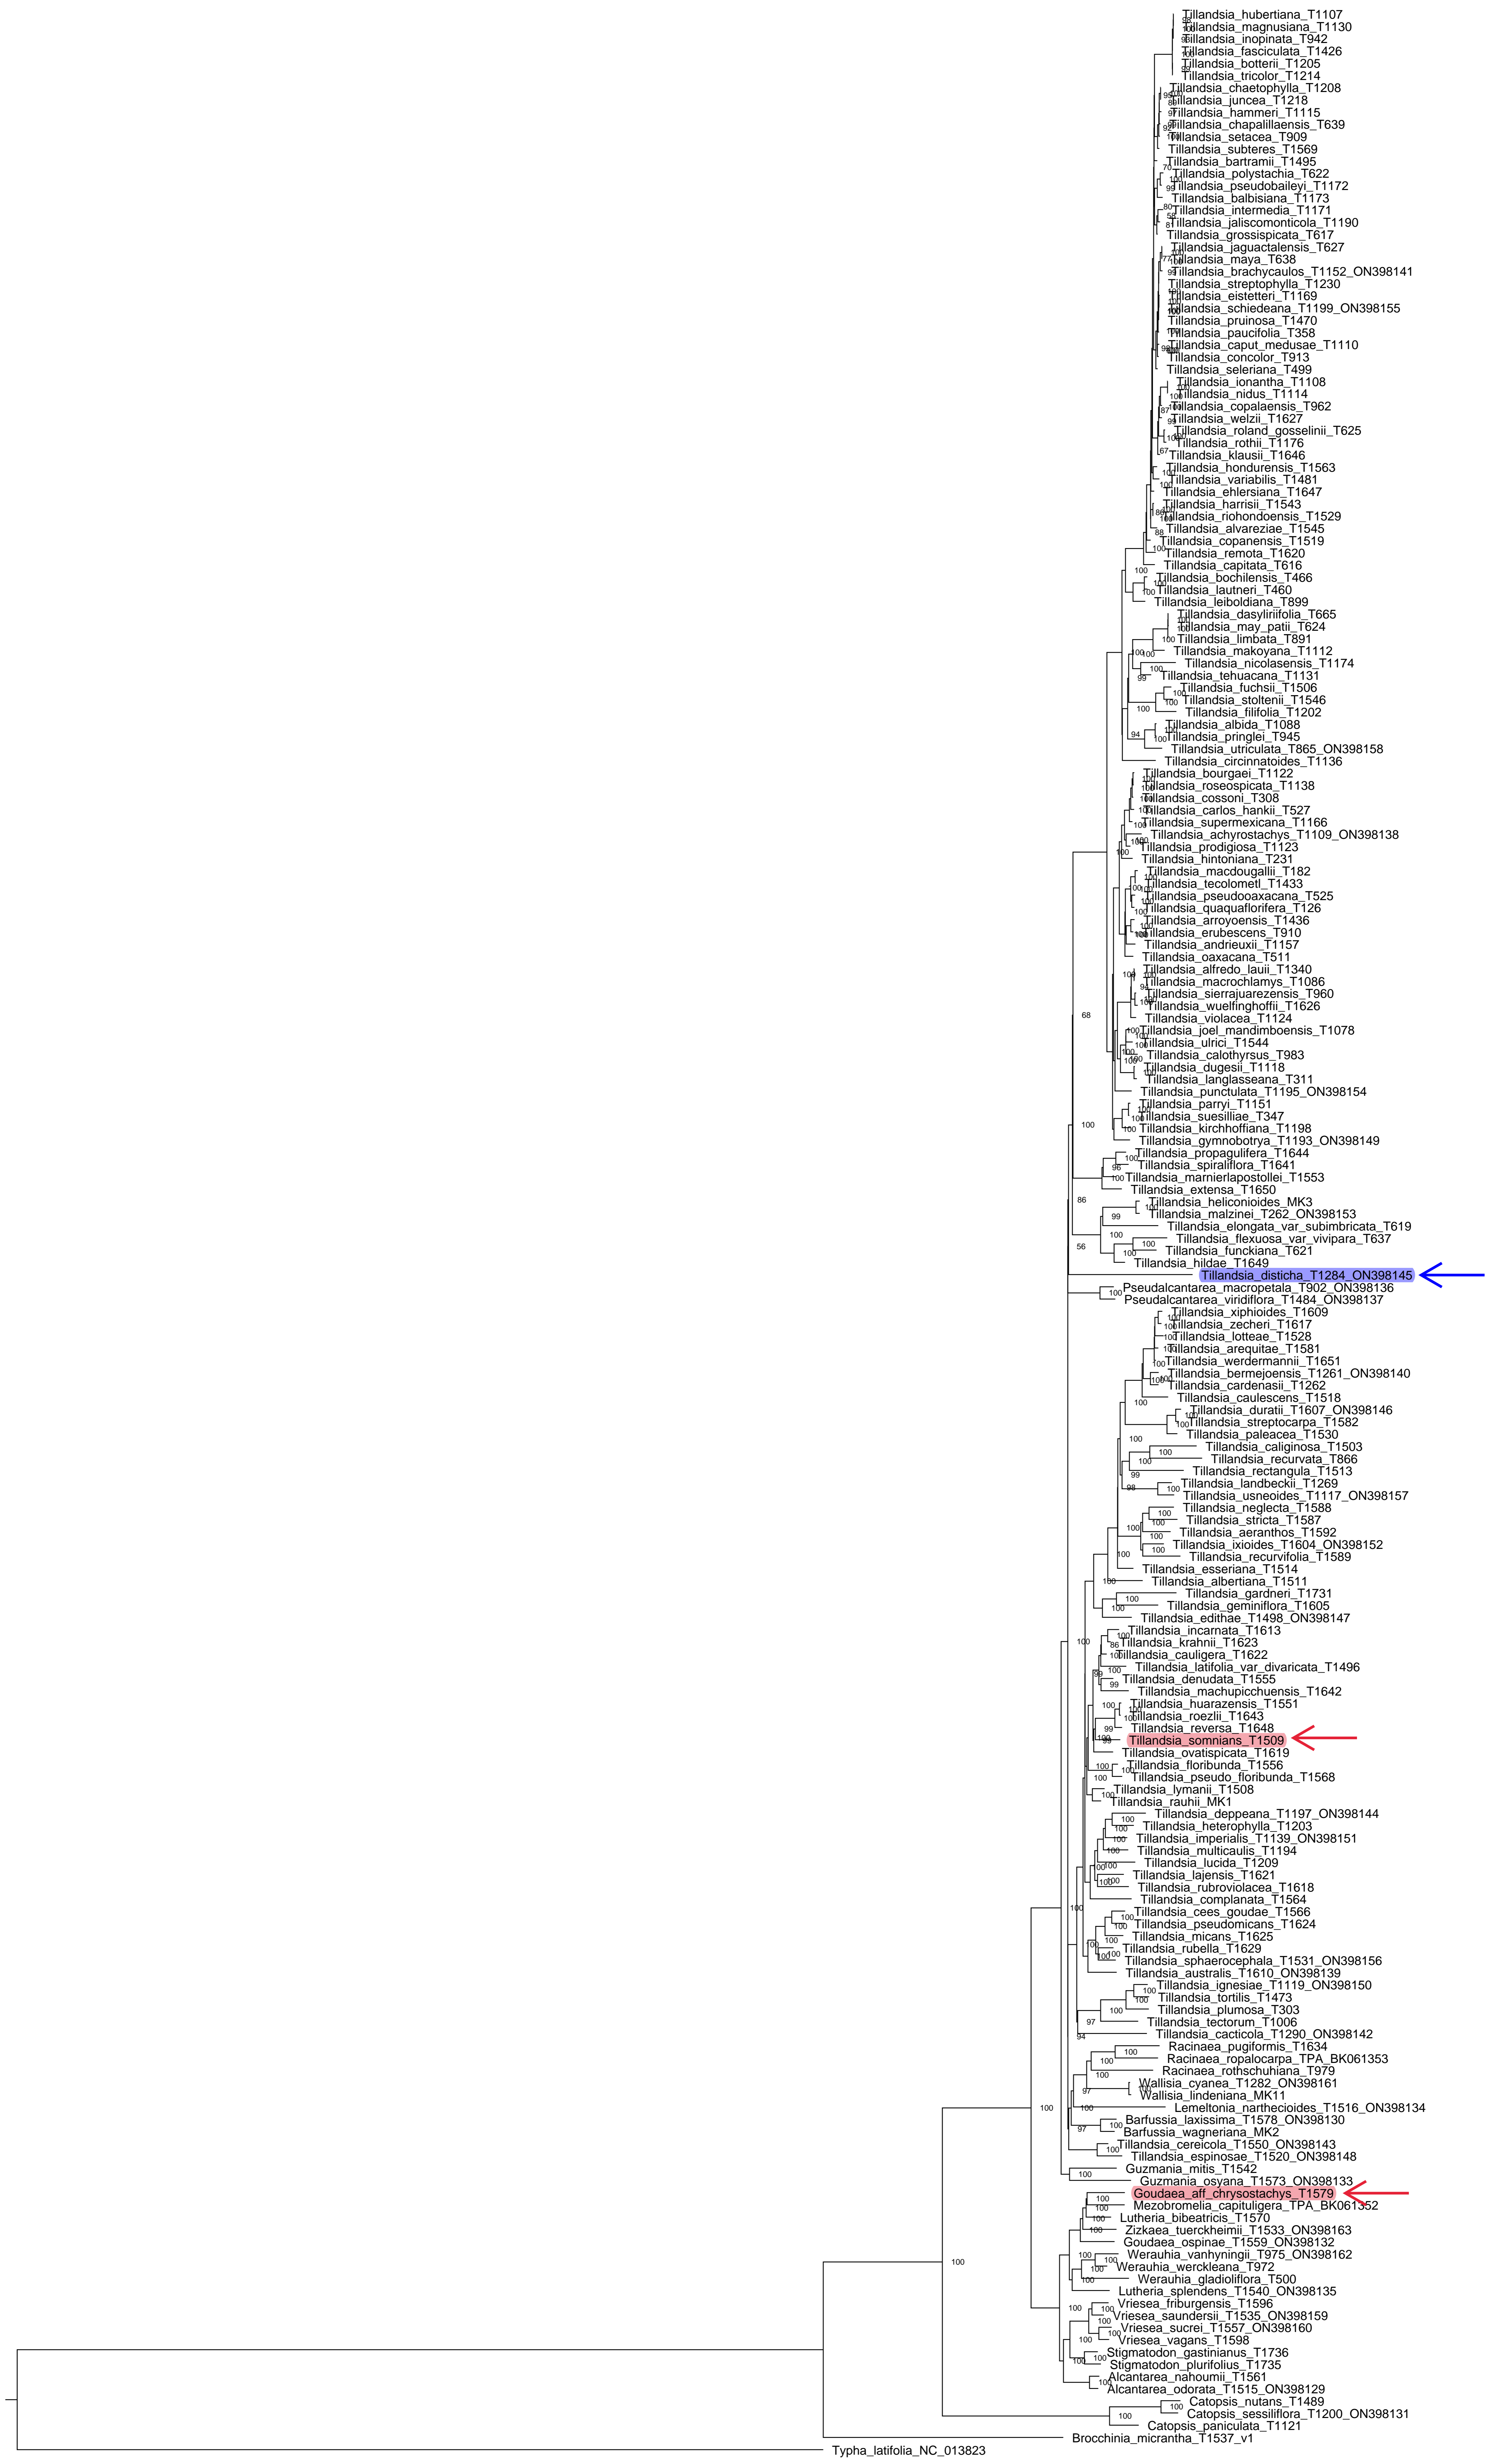

Supplement: Image_2.pdf [file Image_2.pdf]
