# Supplementary material for: Plastome phylogenomics reveals an early Pliocene North- and Central America colonization by long-distance dispersal from South America of a highly diverse bromeliad lineage
Source: Front Plant Sci. 2023 Jun 23;14:1205511. doi: 10.3389/fpls.2023.1205511 (PMC10326849; doi:10.3389/fpls.2023.1205511)
Supplement: Supplementary material 5 — Phylogenetic relationships obtained from an IQ-TREE maximum likelihood analysis of the complete taxon sampling to illustrate a long branch (blue arrow) subtending Tillandsia disticha. Two strongly supported phylogenetic incongruencies relative to the BEAST2 analysis are denoted with red arrows. [file Table_3.xlsx]

## Sheet: Ages
Group	Stem	Stem minHPD	Stem maxHPD	Crown	Crown minHPD	Crown maxHPD				<85
Bromeliaceae	96.71	90.891	114.146	28.69	21.066	37.583
Tillandsioideae	NA	NA	NA	17.7	13.727	19.344
Tribe Catopsideae	17.7	13.727	19.344	5.38	2.735	8.695
Tribe Vrieseeae	11.42	7.663	15.01	6.25	3.814	8.985
Subtribe Vrieseinae	6.25	3.814	8.985	5.39	3.166	7.92
Subtribe Cipuropsidinae	6.25	3.814	8.985	5.01	2.979	7.256
Tribe Tillandsieae	11.42	7.663	15.01	8.83	5.944	12.006
T. disticha complex	7.31	4.784	10.077	NA	NA	NA
Pseudalcantarea	7.31	4.784	10.077	1.79	0.629	3.469
T. subg. Pseudovriesea	7.58	4.952	10.299	2.1	0.776	4.176
Barfussia	7.22	4.789	9.952	1.86	0.666	3.568
Lemeltonia	6.72	4.263	9.192	NA	NA	NA
Wallisia	5.32	3.203	7.574	0.23	0.776	4.176
Racinaea	5.32	3.203	7.574	4.63	2.728	6.79
Guzmania	8.83	5.944	12.006	7.06	4.074	10.194
T. purpurea complex	6.69	4.462	9.229	NA	NA	NA
T. subg . Viridantha	6.69	4.462	9.229	4.38	4.462	9.229
T. australis complex	4.88	2.883	7.029	NA	NA	NA
T. sphaerocephala complex	4.88	2.883	7.029	3.16	1.744	4.848
T. biflora complex clade N	5.92	3.844	8.055	4.93	3.071	6.989
T. rauhii complex	4.88	3.021	7.029	1.99	0.622	4.239
T. biflora complex clade P	4.88	3.021	7.029	4.45	2.621	6.415
T. gardneri complex	5.37	3.482	7.393	4.27	2.55	6.142
T. subg . Anoplophytum s.str.	4.16	2.617	5.775	2.73	1.62	4.048
T. subg. Diaphoranthema	3.93	2.44	5.447	3.68	2.261	5.118
T. subg. Phytarrhiza s.str.	3.33	2.063	4.745	1.23	0.573	2.057
T. subg. Aerobia	3.33	2.063	4.745	1.96	1.106	2.987
T. subg. Tillandsia	7.89	5.221	10.734	7.34	4.806	9.982
T. secunda clade	7.34	4.806	9.982	2.59	1.302	4.235
T. paniculata clade	6.94	4.495	9.428	4.56	2.73	6.688
expanded clade K	6.94	4.495	9.428	4.86	3.03	6.799
clade K.1	4.86	3.03	6.799	2.82	1.725	4.107
clade K.2	4.86	3.03	6.799	3.9	2.44	5.447
